# Supplementary material for: miR-145-3p Inhibits MuSCs Proliferation and Mitochondria Mass via Targeting MYBL1 in Jianzhou Big-Eared Goats
Source: MDPI journal article supplement (doi:10.3390/ijms24098341), 2023-05-06
Supplement: s1 [file s1]

# 1. Supplementary data

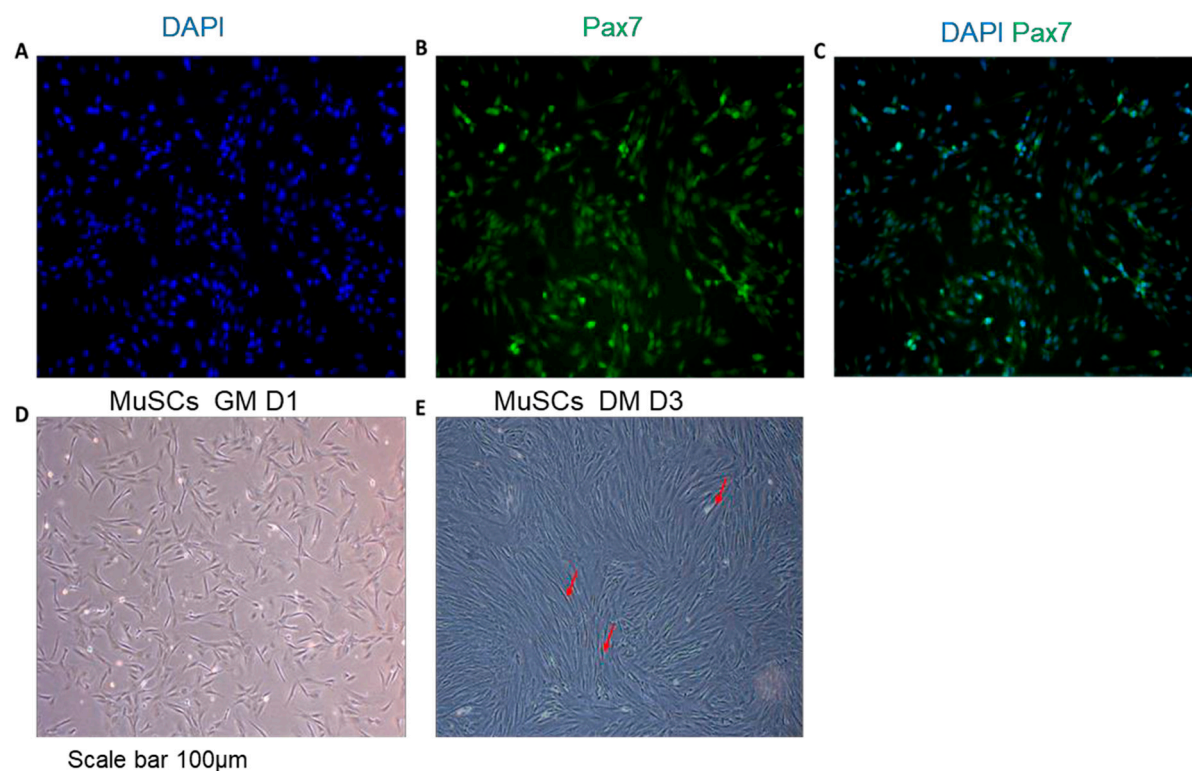

**Supplementary Figure S1.** Identification of goat SMSCs. (A- C) Isolated SMSCs were stained for Pax7 immunofluorescence. The cell nucleus was stained with DAPI (blue) while Pax7 protein was stained green. (D) An image of proliferating SMSCs at day 1 and (E) differentiating SMSCs at day 3 with evidence of myotube formation pointed with red arrows. Scale bar 100µm.

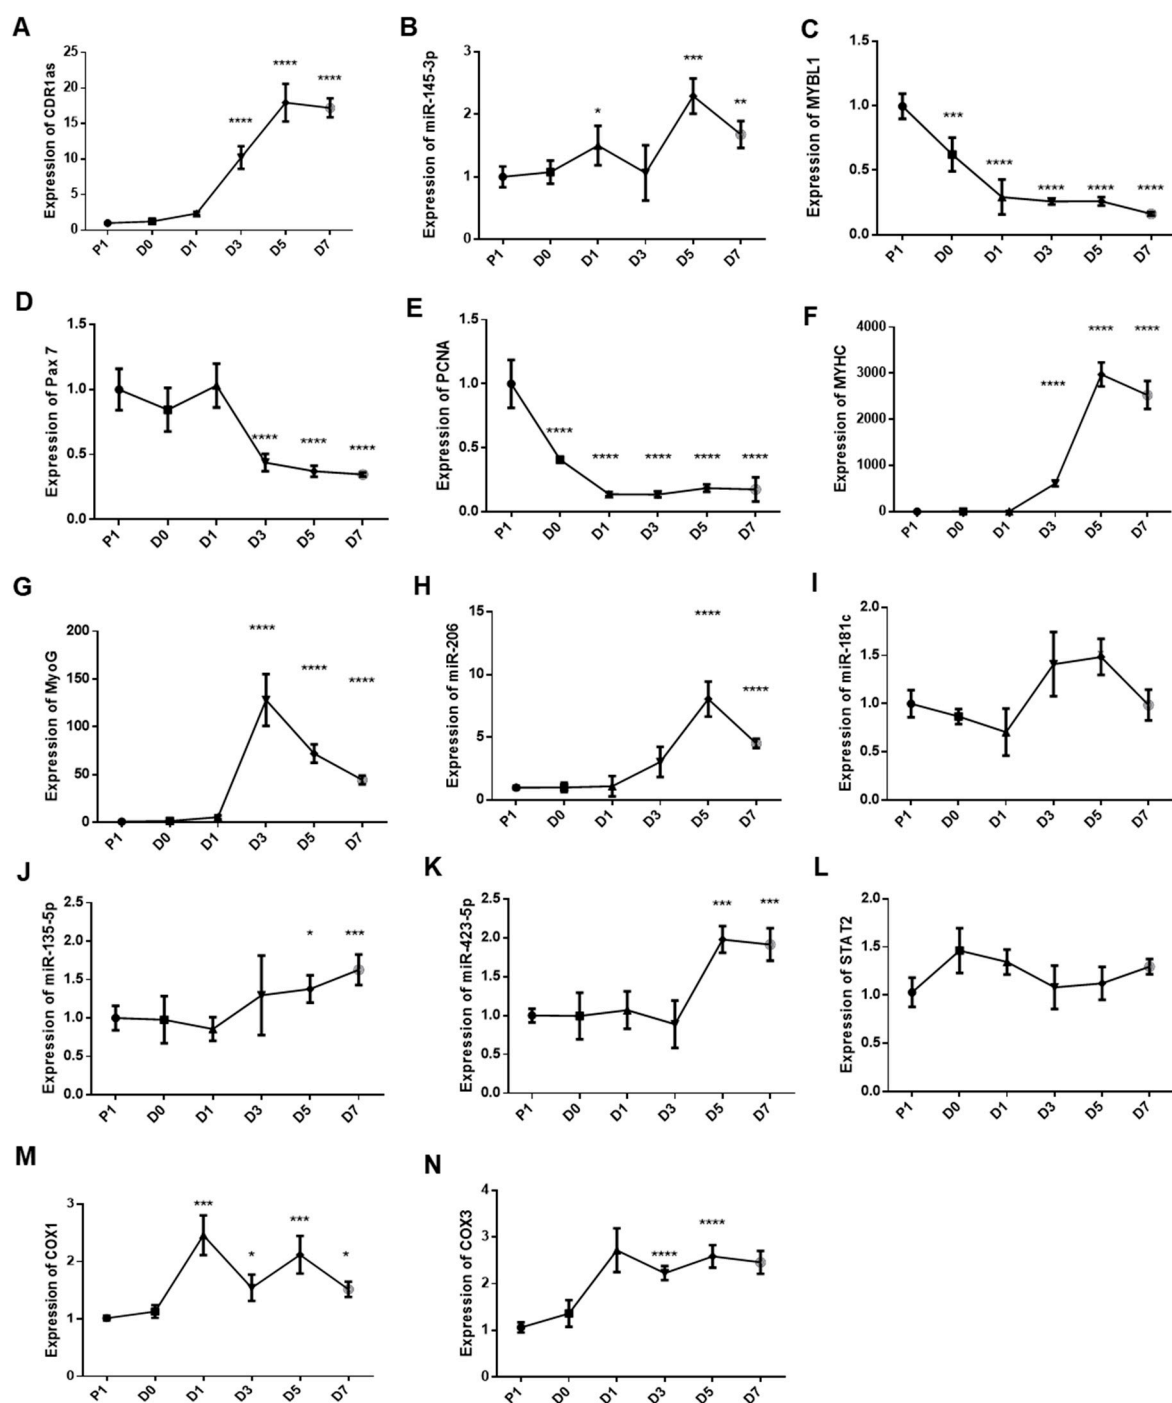

**Supplementary Figure S2.** The expression profile of some genes and miRNAs during myogenic proliferation and differentiation of goat MUSCs. (A) CDR1as, (B) miR-145-3p, (C) MYBL1, (D) Pax7, (E) PCNA, (F) MyHC, (G) MyoG, (H) miR-206, (I) miR-181c, (J) miR-135-5p, (K) miR-423-5p, (L) STAT2, (M) COX1 and (N) COX3. All experiments were repeated three times and statistical differences ( $P < 0.05$ ) are differentiated by \*,  $P < 0.01$  by \*\* and  $P < 0.001$  by \*\*\*.

A

```

Version: RNAhybrid 2.2
Command line: /vol/bioapps/bin/RNAhybrid.bis
searching
dataset: 1
mfe of chi-miR-145-3p: -39.200001
Individual hits
-----

dataset: 1
target: MYB11
length: 2498
miRNA : chi-miR-145-3p
length: 21

mfe: -21.0 kcal/mol
p-value: undefined

position 1679
target S' U GA UAAA U 3'
      GAACAGUA CC AGGA
      CUUGUCAU GG UCCU
miRNA 3' UU AAA UA S'
-----

dataset: 1
target: MYB11
length: 2498
miRNA : chi-miR-145-3p
length: 21

mfe: -20.0 kcal/mol
p-value: undefined

position 616
target S' A U UUC U 3'
      AAGAG CAGUAUU UCCA
      UUCUU GUCAUAA AGGU
miRNA 3' CCUUA S'
-----

dataset: 1
target: MYB11
length: 2498
miRNA : chi-miR-145-3p
length: 21

mfe: -19.9 kcal/mol
p-value: undefined

position 675
target S' U GUAGGAG A 3'
      ACAGUAU CAGGAA
      UGUCAUA GUCCUU
miRNA 3' UUCU AAG A S'

```

B

```

Version: RNAhybrid 2.2
Command line: /vol/bioapps/bin/RNAhybrid.bis
searching
dataset: 1
mfe of chi-miR-145-3p: -39.200001
Individual hits
-----

dataset: 1
target: goatcdrlas
length: 1481
miRNA : chi-miR-145-3p
length: 21

mfe: -21.5 kcal/mol
p-value: undefined

position 1108
target S' A C A 3'
      AAG ACA UGU UGCCAGGAA
      UUC UGU AUA AAGGUCCUU
miRNA 3' U C A S'
-----

dataset: 1
target: goatcdrlas
length: 1481
miRNA : chi-miR-145-3p
length: 21

mfe: -21.4 kcal/mol
p-value: undefined

position 906
target S' C UGAA CGCC A 3'
      GA GGUG UGCCAGGAA
      CU UCAU AAGGUCCUU
miRNA 3' UU UG A A S'
-----

dataset: 1
target: goatcdrlas
length: 1481
miRNA : chi-miR-145-3p
length: 21

mfe: -21.0 kcal/mol
p-value: undefined

position 672
target S' C A CCA C A 3'
      AGAA AG UGU UGCCAGGAA
      UCUU UC AUA AAGGUCCUU
miRNA 3' U G A S'

```

Supplementary Figure S3. (A,B) Binding sites of miR-145-3p to MYBL1 3'UTR and CDR1as.

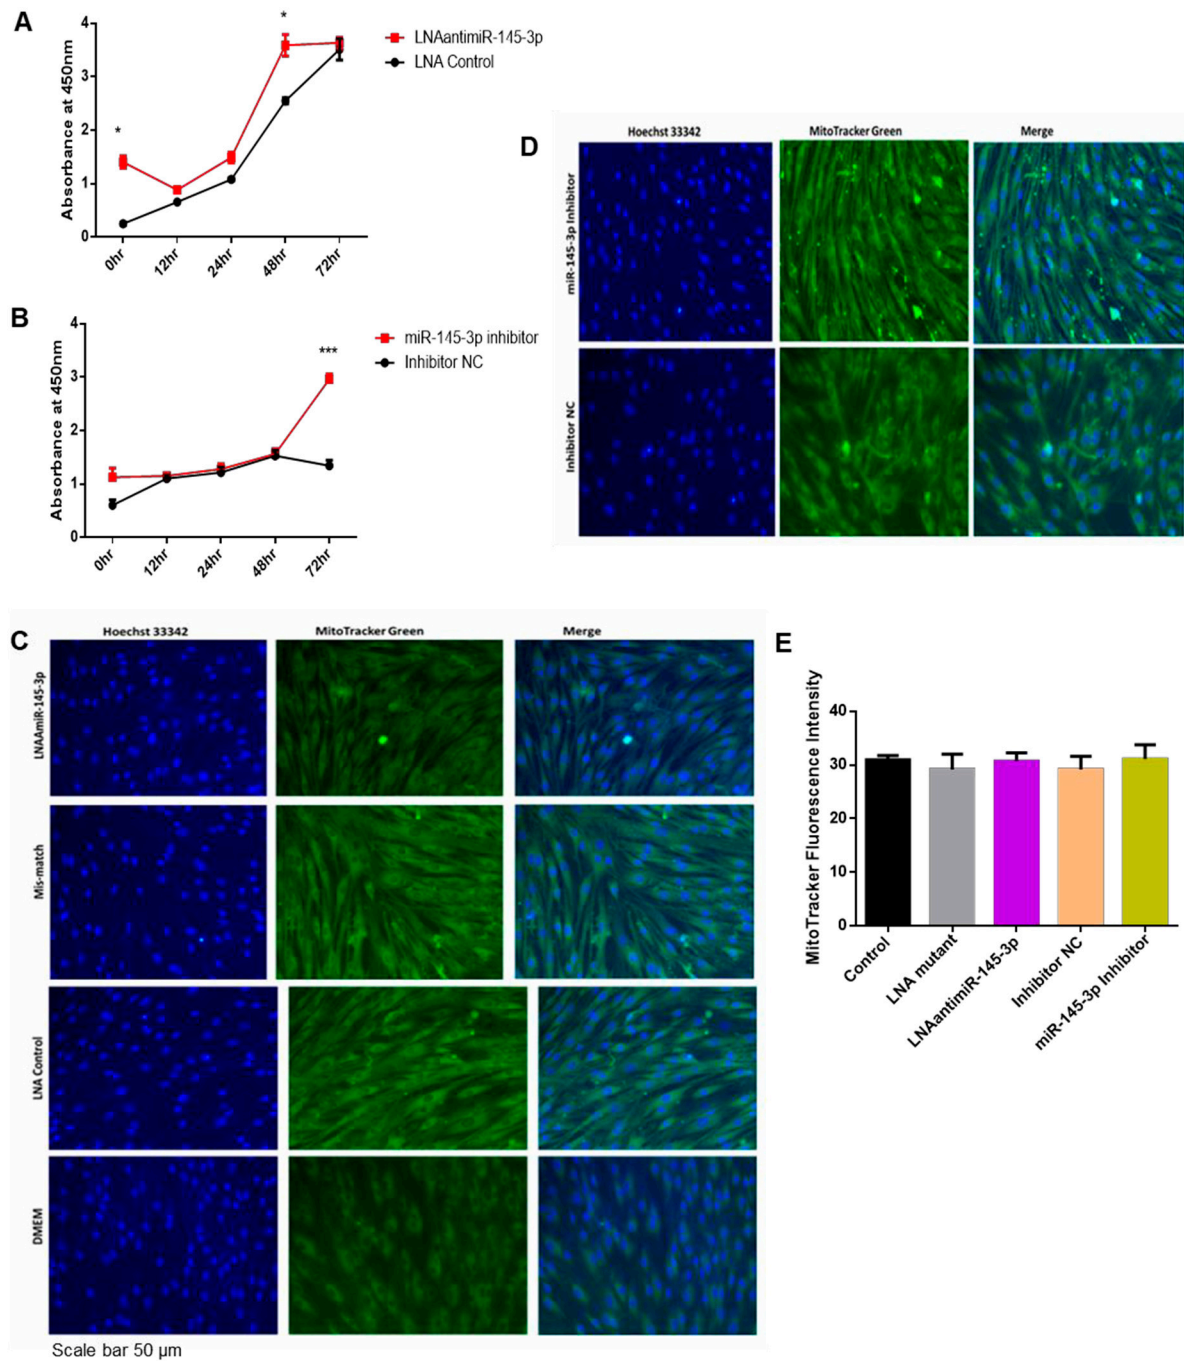

**Supplementary Figure S4.** Knockdown of miR-145-3p had no significant effect on the number of viable cells and active mitochondria in proliferating MuSCs. (A-B) Knockdown of miRNA did not influence cell viability or (C- D) active mitochondria numbers. SMSCs were cultured and the nucleus was stained with Hoechst 33342 while the mitochondria were stained with MitoTracker green (E). Scale bar 50  $\mu$ m. All experiments were repeated three times and statistical differences ( $P < 0.05$ ) are differentiated by \*,  $P < 0.01$  by \*\* and  $P < 0.001$  by \*\*\*.

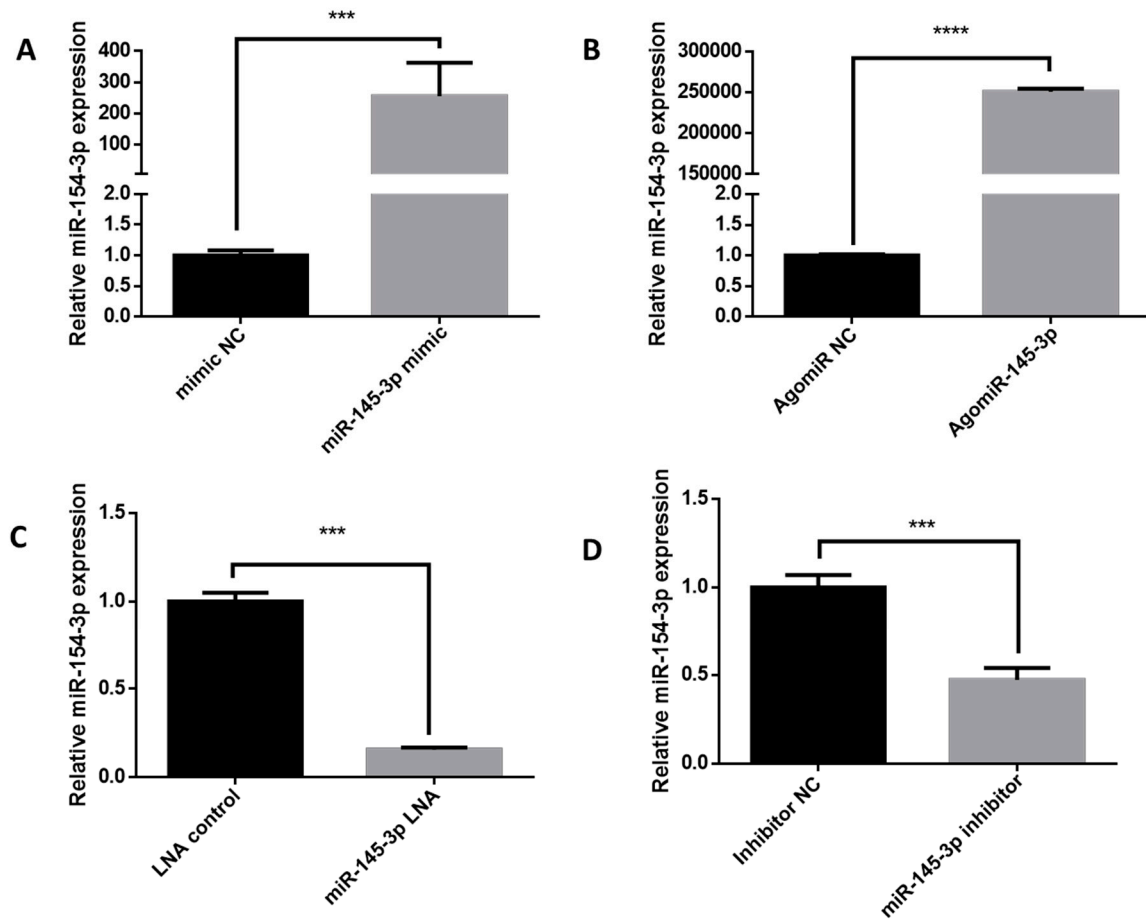

**Supplementary Figure S5.** The transfection efficiency of (A) AgomiR-145-3p, (B) miR-145-3p mimics, (C) miR-145-3p inhibitor and (D) miR-145-3p LNA in MuSCs. All experiments were repeated three times and statistical differences ( $P < 0.001$ ) are differentiated by \*\*\*,  $P < 0.0001$  by \*\*\*\*.

## Supplementary Table

**Table S1.** Primers used for the Dual-luciferase amplification.

| Gene        | Primer sequence                    | Product length/bp | Tm (°C) |
|-------------|------------------------------------|-------------------|---------|
| circ-CDR1as | F CCGCTCGAGCAGAAAAGCCATGTCTTC R    | 456               | 63.8    |
|             | AAATATGCGGCCGCGATTTCCTGGAAGACATG T |                   |         |
|             | F CCGCTCGAGAAAATGTTTTTTCCTTATT     |                   |         |
| s1-MYBL1    | R                                  | 126               | 58.8    |
|             | AAATATGCGGCCGCGATTTCCTTCCAATTAC    |                   |         |
|             | A                                  |                   |         |

|                |                                                                                         |      |      |
|----------------|-----------------------------------------------------------------------------------------|------|------|
| ck-1-MutMYBL1  | F TAACTCGTTGACGCCTTCTTT<br>R TTTCTTTCCAATTTACAAAG                                       | 150  | 49.4 |
| 1-2MutMYBL1    | F GCCTTCTTTATAAATCTCAGTGAGCTGAG<br>R<br>GTCAACGAGTTACCAATAAGGAAAAAACATT TTC             | 122  | 51.5 |
| 2-1mutMYBL1    | F<br>GCCGCGTTCAAACCTTGTAAATTGGAAAGAA ATC<br>R<br>GTCAACGAGTACAATACATTCAACAAAAC TC       | 150  | 60.3 |
| chk2mutMYBL1   | F ATGTTTTTTCCTTATTGGTAA<br>R TTTGAACGCGGCGTCAACGAGTACA                                  | 200  | 53.5 |
| 1-1MutMYBL1    | F<br>TTTTCTTATTGGTAACTCGTTGACGCCTTCTT TAT<br>R<br>GCTCACTGAGATTTATAAAGAAGGCGTCAAC GAGTT | 170  | 50.3 |
| 1,2chkmutMYBL1 | F TTCCTTATTGGTAACTCGTTG<br>R TTTACAAAGTTTGAACGCGG                                       | 500  | 59.0 |
| 3utr-MYBL1     | F AAAGAGTCAGTATTTTCT<br>R AATCCTTTTAGGTCTACT                                            | 1086 | 44.7 |

**Table S2.** Inserted sequence of dual-luciferase reporter vectors.

| Name            | Sequence                                                                                                                                                                                                                                                                                                                                                                                                                                                                                                                            |
|-----------------|-------------------------------------------------------------------------------------------------------------------------------------------------------------------------------------------------------------------------------------------------------------------------------------------------------------------------------------------------------------------------------------------------------------------------------------------------------------------------------------------------------------------------------------|
| CDR1as wild     | ccgctcgagCAGAAAAGCCATGTCTTCCAGGAAATCCATGTCTTCCATCAAATCCAT<br>GGCTTCCAGAAAATCAATGTCTTCCAGGAAATCCATGTCTTCCAGCAAATATTT<br>GTCTTCCAACAAAACGTGTCTTCCATCAAATTCATGTCTTCCAGCCTATCCATC<br>TCTTCCAGAAAATCCTCGTCTTCCAATGAAGGTGCACCTTCCAGGAAATCCACG<br>TCTTCCAGAAAATCCTCGTCTTCCGATGAAGGTGCGCCTTCCAGGAAATCCACG<br>TCTTCCAGAAAATCCTAGTCTTCCAATGAAGGTGCGCCTTCCAGGAAATCCACG<br>TCTTCCAGAAAATCCTCGTCTTCCAATGAAGGTGCACCTTCCAGGAAATCCATG<br>TCTTCCAGAAAATCCCTGTCTTCCAATGAAGGTGCGCCTTCCAGGAAATCCTTG<br>TCTTCCAACAAAGACATGTCTTCCAGGAAaAaatatgcggccgc     |
| CDR1as mutant   | ccgctcgagCAGAAAAGCCATGTGCGCATCTAGCATCCATGTCTTCCATCAAATCCAT<br>GGCTTCCAGAAAATCAATGTGCGCATCTAGCATCCATGTCTTCCAGCAAATATTT<br>GTCTTCCAACAAAACGTGTGCGCATTCAAATTCATGTCTTCCAGCCTATCCATCT<br>CTTCCAGAAAATCCTCGTCTTCCAATGAAGGTGCACCGCATCTAGCATCCACGT<br>CTTCCAGAAAATCCTCGTCTTCCGATGAAGGTGCGCCGCATCTAGCATCCACGT<br>CTTCCAGAAAATCCTAGTCTTCCAATGAAGGTGCGCCGCATCTAGCATCCACGT<br>CTTCCAGAAAATCCTCGTCTTCCAATGAAGGTGCACCGCATCTAGCATCCATGT<br>CTTCCAGAAAATCCCTGTCTTCCAATGAAGGTGCGCCGCATCTAGCATCCTTGT<br>CTTCCAACAAAGACATGTGCGCATCTAGCAaAaatatgcggccgc |
| MYBL1 3UTR wild | ccgctcgagAAAATGTTTTTTCCTTATTGGTAAAGAGTCAGTATTTTCTCCATAAATC<br>TCAGTGAGCTGAGAGTTTTGTTGAATGTATTGTACAGTATGTAGGAGCAGGAA<br>AACTTTGTAAATTGGAAAGAAATCTGTTTTTATAATTTATTTTCAATTTTAAAGC<br>TTAAATGTAGATATTTAAACTTATACAGGGTGTCTAGAAGCCAATGTTGTTTCC                                                                                                                                                                                                                                                                                            |



|                                     |                                                                                                                                                                                                                                                                                                                                                                                                                                                                                                                                                                                                                                                                                                                                                                                                                                                                                                                                                                                                                                                                                                                                                                                                                                                                                                                                                                                                                                                                                                                                                                         |
|-------------------------------------|-------------------------------------------------------------------------------------------------------------------------------------------------------------------------------------------------------------------------------------------------------------------------------------------------------------------------------------------------------------------------------------------------------------------------------------------------------------------------------------------------------------------------------------------------------------------------------------------------------------------------------------------------------------------------------------------------------------------------------------------------------------------------------------------------------------------------------------------------------------------------------------------------------------------------------------------------------------------------------------------------------------------------------------------------------------------------------------------------------------------------------------------------------------------------------------------------------------------------------------------------------------------------------------------------------------------------------------------------------------------------------------------------------------------------------------------------------------------------------------------------------------------------------------------------------------------------|
|                                     | <p>TGTTATTACAGATAACATAGTAAAGAACAATTTTGACTTTTAAGTATGAAACAG<br/> TAGTAAGTTATAGCTGCAAAGAATTCAGTATCTATACTGTATGTCACATCTACC<br/> TAAATATTGCACTATGTCCTTTAAATCATGTTGGTTATAAAGTAGTTCTAAAAAT<br/> TACTAAATAATAATTTAATATTTTCTTTTAAATTATATGGGGGGTCATATAAA<br/> TTAATCTGGTGATTTGTATATTTGTTTTAAATTTTGCATTTTGTTTTAAAAAATA<br/> ATATGGTACTTTGGTCCCTAAAAACAGTCTGCACTTAGAAGTTTATTATATTTAC<br/> TCAGTGTTTAAGAAGTAGAGAACAGTATCTTTTATTTATAAAAAATATTTGTCCTT<br/> TTATAAATGTTTTGTGTTTCTCTACAGGTTACAACAGTTGCTTCAGTTGCCTGTTT<br/> TAGGTGTTTGCCTTACTTTATTTCTTCTTGAAAGAATGCTTTTATTTGCTTTTGT<br/> GTAGAGATTTTATGTAATTTTTTGAAACATATAATGGTATGCTGTCAACTTAAA<br/> CACTGACAGGTAAATAGAATTGTACACTGTAGTTGTAATTATTTGTAATTGACA<br/> CACTCTCTCCCTCTCCACTCCTGAAGTATGCTGCTATAGAAAATAGCAGAATCG<br/> GCTTGCTGCTATGAGAGAAGGAAAGAGCGACCACCACTTGCCTGTGTGAAAA<br/> CATAAAAAGTATGATGATGGCAAGTTCTCAAGTTAACTTAATGGAATCAACCA<br/> TTACCAGGCAAATTCTTGCAAATACCAAAAATGCTCTGCCTTAAAACAAAAACA<br/> GCTTAAGATTCTCTGTTGATGGAATGGAAATACGAAGTATTTTAATGCCTAGC<br/> TTTTGAACAGTAGACCTAAAAGGATTaaatatgcggccgc<br/> ccgctcgagAAAATGTTTTTTCCTTATTGGTAACTCGTTGACGCCTTCTTTATAAATCT<br/> CAGTGAGCTGAGAGTTTTGTTGAATGTATTGTACTCGTTGACGCCGCGTTCAAA<br/> CTTTGTAAATTGGAAAGAAATCaaatatgcggccgc<br/> ccgctcgagAAAATGTTTTTTCCTTATTGGTAACTCGTTGACGCCTTCTTTATAAATCT<br/> CAGTGAGCTGAGAGTTTTGTTGAATGTATTGTACTCGTTGACGCCGCGTTCAAA<br/> CTTTGTAAATTGGAAAGAAATCaaatatgcggccgc<br/> ccgctcgagAAAATGTTTTTTCCTTATTGGTAACTCGTTGACGCCTTCTTTATAAATCT<br/> CAGTGAGCTGAGAGTTTTGTTGAATGTATTGTACTCGTTGACGCCGCGTTCAAA<br/> CTTTGTAAATTGGAAAGAAATCaaatatgcggccgc</p> |
| MYBL1 3UTR<br>mutant                |                                                                                                                                                                                                                                                                                                                                                                                                                                                                                                                                                                                                                                                                                                                                                                                                                                                                                                                                                                                                                                                                                                                                                                                                                                                                                                                                                                                                                                                                                                                                                                         |
| MYBL1 3UTR<br>mutant (pt<br>616)    |                                                                                                                                                                                                                                                                                                                                                                                                                                                                                                                                                                                                                                                                                                                                                                                                                                                                                                                                                                                                                                                                                                                                                                                                                                                                                                                                                                                                                                                                                                                                                                         |
| MYBL1<br>3UTR<br>mutant<br>(pt 675) |                                                                                                                                                                                                                                                                                                                                                                                                                                                                                                                                                                                                                                                                                                                                                                                                                                                                                                                                                                                                                                                                                                                                                                                                                                                                                                                                                                                                                                                                                                                                                                         |

Capital letters represent the actual sequence and the smaller letters represent the recognition sites of the Enzyme Not1 and Xho1.

**Table S3.** Primers used for qRT-PCR amplification.

| Gene                                             | Primer sequence                                                          | Product length/bp | Tm<br>(oC) |
|--------------------------------------------------|--------------------------------------------------------------------------|-------------------|------------|
| CDR1as<br>(Divergent primer)<br>(XM_013976302.1) | F AGCAGGCTCAATATCTACG<br>R CTGGAAGACCTTGACACTG                           | 118               | 53.9       |
| COX-1                                            | F CCTCCTTTCCTTCTGTATT<br>R TGTGTTTAGGTTTCGGTCTGT                         | 67                | 53.7       |
| COX-2                                            | F TAGAGGTAGATAACCGAGT<br>R GAACGATTGGTATGAAAC<br>F GAAGGAGACCGTAACCACATA | 225               | 49.5       |
| COX-3                                            | R<br>GGACAACGCAGAGAATCAAAC                                               | 175               | 55.6       |
| CSNK1A1<br>(XM_005683156.3)                      | F TTATTCCTTATTGATTTTGGTCC<br>R TTGCCTTGTCCTGTTGTCT                       | 57                | 54.4       |
| GAPDH<br>(XM_005680968.3)                        | F GCAAGTTCCACGGCACAG<br>R GGTTACGCCCATCACAA                              | 249               | 59         |
| MEF2C<br>(NM_001314204.1)                        | F CCCCAGTGGTTTCCGTAGCA<br>R GCTGTTGTTGCCAGCCAGTT                         | 183               | 58.5       |

|                  |   |                          |     |      |
|------------------|---|--------------------------|-----|------|
| miR-1271-3p      |   | AGTGCCTGCTATGTGCCAGG     | 20  | 59.5 |
| miR-129-5p       |   | CTTTTTCGGTCTGGGCTTGC     | 21  | 59.5 |
| miR-135-5p       |   | GGTCCTCAGTGTAGCCCAAG     | 20  | 59.5 |
| mir-143-3p       |   | TGAGATGAAGCACTGTAGCTCG   | 22  | 50   |
| miR-145-3p       |   | ATTCCTGGAAATACTGTTCTT    | 21  | 49.8 |
| miR-16           |   | TAGCAGCACGTAAATATTGGCG   | 22  | 50.8 |
| miR-181c         |   | CAAGGGTTTGGGGGAACATTCA   | 21  | 51.7 |
| miR-218          |   | TGTTTAATATTTTGCAATAATT   | 22  | 57.7 |
| miR-379-5p       |   | TGGTAGACTATGGAACGTAGG    | 21  | 55.6 |
| miR-423-5p       |   | TGAGGGGCAGAGAGCGAGACT    | 21  | 61.5 |
| MYBL1            |   | F CAGCAGAACTCACCGACAAAG  | 61  | 57.8 |
| (XM_005689032.3) |   | R GTAGAGAGGACAACACAGCGT  |     |      |
| MyHC             |   | F CGCCACCTGGAGCGGATGA    | 171 | 61.3 |
| (XM_013972193.2) | R | CTTGCGGTCTCTCGGTCTGGT    |     |      |
| MyoD             |   | F GTGCAAACGCAAGACGACTA   | 128 | 60.7 |
| (XM_018058990.1) |   | R GCTGGTTTGGGTGCTAGAC    |     |      |
| MyoG             |   | F GGACCCTACAGATGCCCACAA  | 101 | 60.7 |
| (NM_001285733.1) |   | R TTGGTATGGTTTCATCTGGG   |     |      |
| Myomaker         |   | F CCCTGGCTCTCATGTTGCGCTT | 131 | 56.9 |
| (XM_018056156.1) |   | R TGCACCTCCGGCCTTCTTGTG  |     |      |
| Myomerger        |   | F GGGCTGTCTGTTGTTTCGTC   | 146 | 58.3 |
| (NC_030823.1)    |   | R AGCATTTTCAGGGGGCACAGC  |     |      |
| Pax7             |   | F AGGACGAAGCGGACAAGAA    | 91  | 50.5 |
| (XM_018054746.1) |   | R TCCAGACGGTTCCTTTGT     |     |      |
| PCNA             |   | F TGAAGAAAGTGCTGGAGGCG   | 156 | 61.3 |
| (XM_005688167.3) |   | R TTTGGACATGCTGGTGAGG    |     |      |
| PDE4B            |   | F GACTTCATCGTCCATCCGCTG  | 128 | 59.5 |
| (XM_018045239.1) |   | R TGGGAGGGGCTCTGGTGTAT   |     |      |
| SRSF11           |   | F TGTCTCGTTCAAAATCCCCT   | 156 | 54.5 |
|                  |   | R TTCATCGTAGTCCCGTGTAAG  |     |      |
| VCPIP1           |   | F TGACCCTCTGTTTGTACCGC   | 84  | 60   |
|                  |   | R CGATGAAGCACATTGGCGAG   |     |      |
| Vexin            |   | F AGTCCAGCCAGAAGTAGAGT   | 79  | 55.6 |
|                  | R | CTTGGTGAAGAGATGTTGAGAG   |     |      |
| U6               |   | F CTCGCTTCGGCAGCACA      | 94  | 55.9 |
|                  |   | R AACGCTTCACGAATTTGCGT   |     |      |
| GAPDH            |   | F GCAAGTTCCACGGCACAG     | 249 | 59.0 |
| (XM_005680968.3) |   | R GGTTACGCCCCATCACAA     |     |      |
